# Supplementary material
Source: publisher site journal article supplement (https://www.dovepress.com/article/576138)
Supplement: Supplementary file 1 [file 576138%20Supplementary%20Table%20S1.docx]

**Supplementary Table S1. Effect sizes and confidence intervals for secondary outcomes.**

| Outcome | Cohen’s d | 95% CI | P value | Bonferroni-corrected α |
| --- | --- | --- | --- | --- |
| **Oxygenation Parameters** |  |  |  |  |
| MSaO₂ (post-intervention) | 0.89 | 0.48–1.30 | <0.0001 | 0.025 |
| LSaO₂ (post-intervention) | 0.95 | 0.53–1.36 | <0.0001 | 0.025 |
| **Sleep Architecture Parameters** |  |  |  |  |
| Obstructive apnea frequency | 0.92 | 0.50–1.33 | <0.0001 | 0.0125 |
| Awakening frequency | 1.05 | 0.62–1.47 | <0.0001 | 0.0125 |
| Sleep onset latency | 0.87 | 0.46–1.28 | <0.0001 | 0.0125 |
| Hypoventilation frequency | 0.78 | 0.37–1.18 | <0.0001 | 0.0125 |
| **Psychological Outcomes** |  |  |  |  |
| SAS score (post-intervention) | 1.12 | 0.69–1.55 | <0.0001 | 0.025 |
| SDS score (post-intervention) | 0.98 | 0.56–1.40 | <0.0001 | 0.025 |

*Abbreviations: MSaO₂, mean arterial oxygen saturation; LSaO₂, least arterial oxygen saturation; SAS, Self-rating Anxiety Scale; SDS, Self-rating Depression Scale; CI, confidence interval.* *Note: Cohen’s d values of 0.2, 0.5, and 0.8 are conventionally interpreted as small, medium, and large effects, respectively. Bonferroni correction was applied within each outcome domain. All results remained statistically significant after correction.*
